# Supplementary material for: Analysis of A 6-Mirna Signature in Serum from Colorectal Cancer Screening Participants as Non-Invasive Biomarkers for Advanced Adenoma and Colorectal Cancer Detection
Source: PubMed Central journal article supplement (PMC6827108; doi:10.3390/cancers11101542), 2019-10-12
Supplement: cancers-11-01542-s001.pdf [file cancers-11-01542-s001.pdf]

## Supplementary Materials: Analysis of A 6-Mirna Signature in Serum from Colorectal Cancer Screening Participants as Non-Invasive Biomarkers for Advanced Adenoma and Colorectal Cancer Detection

**Table S1.** Individual results of the logistic regression model in serum samples for each individual miRNA from the signature (adjusted by age and gender). CI: confidence interval; OR: odds ratio.

| Serum miRNA       | CCR vs. Controls |                 | AA vs. Controls  |                 |
|-------------------|------------------|-----------------|------------------|-----------------|
|                   | OR(95% CI)       | <i>p</i> -value | OR (95%CI)       | <i>p</i> -value |
| <b>miR-15b-5p</b> | 1.13 (0.85-1.50) | 0.40            | 1.27 (0.98-1.63) | 0.07            |
| <b>miR-18a-5p</b> | 1.15 (0.91-1.45) | 0.24            | 1.01 (0.89-1.33) | 0.42            |
| <b>miR-29a-3p</b> | 1.30 (0.97-1.74) | 0.07            | 1.52 (1.16-2.00) | 0.002           |
| <b>miR-19a-3p</b> | 1.31 (1.02-1.68) | 0.03            | 1.32 (1.07-1.62) | 0.01            |
| <b>miR19b-3p</b>  | 0.96 (0.72-1.27) | 0.77            | 0.94 (0.76-1.17) | 0.59            |
| <b>miR-335-5p</b> | 1.30 (1.01-1.62) | 0.01            | 1.26 (1.04-1.52) | 0.01            |
